# Supplementary material
Source: Elsevier journal article supplement (https://www.sciencedirect.com/science/article/pii/S0213911116301728)
Supplement: mmc1 [file S0213911116301728:mmc1.docx]

**Apéndice I**

**Estrategia integrada de atención proactiva a pacientes crónicos complejos (ATENPRO) en el Baix Empordà**

Se presenta en este anexo un desarrollo detallado del programa que corresponde a la intervención evaluada, enunciada en el apartado Métodos del texto principal del artículo. Para describir cada una de las intervenciones que componen la estrategia se ha seguido la sistemática TIDieR1, aunque obviando aquellos apartados que en algún caso no son de aplicación.

**1. Identificación de pacientes crónicos complejos**

| **Intervención 1** | **Modelo de predicción del riesgo individual de alto coste sanitario. Procedimiento de marcaje de pacientes** |
| --- | --- |
| ¿Por qué? | El riesgo de consumo sanitario total elevado se relaciona con la presencia de condiciones clínicas crónicas y su nivel de complejidad. Por ello, los individuos clasificados como de alto riesgo corresponden a personas con enfermedades crónicas complejas, tributarias de un abordaje asistencial de gestión de casos.  En términos de utilización de servicios sanitarios, pertenecer al grupo de alto coste (*top* 5%) multiplica por cuatro el número de visitas en atención primaria, por nueve el número de visitas en atención especializada, por cinco el número de visitas a urgencias hospitalarias, por 90 el de estancias de hospitalización de agudos y por más de cinco el número de pruebas diagnósticas, y copan la casi totalidad de las estancias en el ámbito sociosanitario.  En conjunto, los pacientes del grupo de alto coste acumulan el 39% del coste de recetas de farmacia y el 82% de las estancias hospitalarias2. |
| ¿Qué se valora? | Mediante técnicas de modelización aplicadas a una población definida, puede predecirse de manera suficientemente válida el riesgo individual de efectuar un consumo sanitario elevado, considerando las características sociodemográficas, de morbilidad y de utilización previa de recursos como factores predictivos.  El modelo utilizado incluye como variables predictoras la edad, la morbilidad (CRG, a nivel ACRG33), el gasto de recetas de farmacia superior al percentil 95, el consumo de medicación hospitalaria de dispensación ambulatoria y la hospitalización, según datos del año previo.  Según el estudio de validación del modelo previamente efectuado, la varianza explicada fue del 38,2% (R2 de Nagelkerke = 0,382), la sensibilidad fue del 48,4% (IC: 46,9%-49,8%), la especificidad fue del 97,2% (IC: 97,0%-97,3%) y el valor predictivo positivo fue del 46,5% (IC: 45,0%-47,9%). El área bajo la curva ROC fue de 0,897 (IC: 0,892-0,902)4. |
| ¿Quién calcula el modelo? | El Departamento de Evaluación e Investigación de los Serveis de Salut Integrats Baix Empordà (SSIBE) calcula cada año, en el primer trimestre, el riesgo individual de alto coste de toda la población asignada. Se selecciona e identifica el 5% de personas de mayor riesgo, a las que se denomina pacientes crónicos complejos (PCC).  El punto de corte siempre se fija en el p95, para mantener una carga por profesional similar, sin desestimar así los que aumentan su grado de riesgo ni mantener aquellos en que disminuye. Así, en cada recálculo, algunos individuos pierden la marca de PCC y otros la ganan. |
| ¿Cómo se completa? | A partir de esta identificación se realizan las siguientes actividades:   1. Se introduce una marca en la historia clínica electrónica (HCE) visible para todo el personal. (Durante el estudio solo fue introducida en las personas pertenecientes a los grupos de intervención parcial e intervención total.) 2. Se envía a los médicos y enfermeros del equipo asistencial de atención primaria un listado de pacientes de su cupo que se marcan como PCC. (Durante el estudio estos listados solo incluían los pacientes del grupo de intervención total.) 3. Durante el estudio los pacientes del grupo control permanecieron ocultos. |
| ¿Qué modificaciones se han realizado? | En el segundo año del estudio se procedió del mismo modo con las siguientes modificaciones:   1. Los pacientes clasificados de nuevo como PCC (recurrencia) fueron asignados al mismo grupo experimental que en el año anterior 2. Los pacientes que durante el año fallecen o pierden la característica de PCC para el año siguiente son desmarcados y sustituidos. 3. Los pacientes que el año previo no tenían marca de PCC y en el año 2 sí, se asignaron aleatoriamente a los grupos de intervención. |
| ¿Dónde se puede consultar? | En los pacientes identificados como PCC se muestra una etiqueta en la HCE, que no es modificable por los profesionales clínicos.  En la base de datos de explotación de SSIBE se guarda la etiqueta y el periodo de vigencia de la misma. Permite hacer explotaciones en función de esta marca.  Los profesionales disponen de una opción en la HCE que presenta un listado de pacientes marcados asignados a un equipo asistencial (médico-enfermera). El listado incluye datos de identificación del paciente, edad, probabilidad estimada por el modelo, CRG del año anterior, consumo farmacéutico del año anterior y fallecimiento (campo de actualización automática en el momento en que se solicita el listado). |
| ¿Cuándo se actualiza? | El modelo se calculó y validó originariamente con datos de los años 2006 y 2007.  Antes de empezar el estudio se procedió a una actualización del modelo, con los datos más recientes. Los resultados fueron sensibilidad 45,21% (43,77%-46,66%), especificidad 97,32% (97,21%-97,43%), valor predictivo positivo 47,46% (45,98%-48,95%) y valor predictivo negativo 97,08% (96,96%-97,19%). Se utilizaron los coeficientes calculados en esta actualización. |

| **2. Acciones proactivas desarrolladas específicamente desde atención primaria** | |
| --- | --- |
| **Intervención 2** | **Valoración previa y plan de intervención individualizada** |
| ¿Por qué? | Para adelantarse de forma proactiva a las situaciones de descompensación clínica de los PCC, previendo las necesidades asistenciales más apropiadas para cada caso en particular.  Para agrupar en un único documento, accesible a todos los profesionales asistenciales, la información relativa a las necesidades físicas, psíquicas y sociales de los pacientes identificadas a través de valoraciones estandarizadas. |
| ¿Qué se valora? | Las valoraciones llevadas a cabo por los profesionales sanitarios se agruparon en:  a) Acciones generales:  - Revisión y actualización de la pauta terapéutica.  - Valoración del cumplimiento del tratamiento prescrito, mediante el test de Morisky-Green5.  - Adherencia a las visitas programadas de atención primaria y atención especializada.  b) Escalas de valoración:  - Riesgo social (escala de Gijón)6.  - Índice de Barthel7.  - Fragilidad (escala de Downton)8.  c) Acciones específicas según la patología:  - Asegurar el uso correcto de inhaladores.  - Asegurar el uso correcto de la oxigenoterapia.  - Asegurar el seguimiento de la dieta específica.  - Conocer y detectar signos de descompensación. |
| ¿Quién lo completa? | Los médicos y las enfermeras de atención primaria (intervención en población asignada) y de sociosanitario (intervención en población ingresada).  En el caso de los recursos sociosanitarios se aplicaba a pacientes con ingreso de larga estancia. |
| ¿Cómo se completa? | Los profesionales de atención primaria practicaban las valoraciones indicadas y las completaban con una revisión de la HCE del paciente en caso de que este hubiera sido dado de alta del hospital de agudos, de urgencias o del sociosanitario.  Los profesionales de atención sociosanitaria completaban la valoración a los 3 meses del ingreso del paciente en dicho recurso.  Se actualizó anualmente o cuando el paciente sufría un cambio significativo de su situación clínica. |
| ¿Dónde se puede consultar? | La valoración y el plan de intervención son un documento electrónico que está accesible en la HCE del paciente. |
| ¿Qué modificaciones ha sufrido? | La primera versión fue un curso clínico que se diferenciaba del resto de cursos por estar titulado como PLAN TERAPEUTICO_ PACIENTE CRÓNICO COMPLEJO. Este fue introducido por SSIBE en el momento en que se puso en marcha el programa de atención proactiva.  Un año y medio más tarde de su introducción, el Departamento de Salud de la Generalitat de Catalunya, a través de las grandes líneas estratégicas enfocadas a la atención del paciente con problemas de salud crónicos, introdujo la primera versión del Plan de Intervención Individualizado y Compartido (PIIC) como informe no estructurado. Posteriormente, el PIIC se convirtió en un documento con apartados estructurados que se incorporó a la Historia Clínica Compartida de Catalunya, y por tanto accesible a cualquier proveedor sanitario del territorio. |

**3. Accesibilidad y coordinación entre niveles asistenciales**

| **Intervención 3a** | **Unidad de pacientes crónicos complejos (UPCC)** |
| --- | --- |
| ¿Por qué? | Para evitar ingresos hospitalarios no planificados. |
| ¿Qué se valora? | Los criterios aplicados para determinar si un paciente era susceptible de recibir la prestación de la UPCC fueron:   1. Presencia de reagudizaciones frecuentes que han generado dos o más ingresos en el último año en pacientes con insuficiencia cardiaca congestiva o enfermedad pulmonar obstructiva crónica, identificados o no como PCC. 2. Descompensación que puede provocar un nuevo ingreso en los próximos días o semanas. 3. Tratamientos intensivos de difícil manejo por parte del equipo de atención primaria para garantizar un control adecuado. 4. Existencia de soporte familiar y cierta autonomía que permita el manejo de forma ambulatoria. |
| ¿Quién hacía la prestación? | Un médico y una enfermera de la especialidad de medicina interna. |
| ¿Cómo se iniciaba la prestación? | Los profesionales sanitarios (de atención primaria, de urgencias, del hospital de agudos, de consultas externas, del sociosanitario), a través de una interconsulta, comunicaban al profesional responsable de la UPCC la existencia de un paciente susceptible de la prestación. Este aplicaba los criterios de inclusión y, en caso positivo, comenzaba la prestación con una serie de sesiones ambulatorias diurnas.  Previo a la finalización de la serie de sesiones pactadas, se procedía a la revisión de toda la medicación y se preparaba una hoja con las pautas a seguir una vez dada el alta de la UPCC.  En el momento del alta, el responsable de la UPCC lo notificaba a los profesionales de atención primaria a fin de que estos continuaran con el seguimiento de la situación clínica del paciente. |

| **Intervención 3b** | **Circuito de soporte al alta de hospitalización (CSA)** |
| --- | --- |
| ¿Por qué? | Para garantizar la comunicación entre niveles asistenciales (de la atención especializada a primaria) en el momento en que el paciente es dado de alta. |
| ¿Qué se valora? | De acuerdo con la condición clínica (ya estabilizada), se valora el seguimiento de primaria porque se trata de pacientes identificados en su HCI como PCC y:  - con problemas respiratorios crónicos,  - con insuficiencia cardiaca,  - con diagnóstico de accidente vascular cerebral,  - en situación terminal,  - incluidos en el programa de atención domiciliaria,  - con reingresos en los últimos 12 meses por el mismo grupo de patologías, o  - con necesidades de cuidados específicos. |
| ¿Quién generaba el aviso? | Un médico o una enfermera de los recursos especializados (hospital de agudos, larga estancia sociosanitaria) generaba el aviso una vez valorados los criterios de inclusión. |
| ¿Cómo se iniciaba la prestación? | En las 24 horas previas al alta se hacía una revisión de los criterios de inclusión, y si era positiva se avisaba a admisiones de la planta para que programase un aviso en la agenda de la enfermera gestora correspondiente (enfermera del equipo de atención primaria). |
| ¿Dónde es accesible la prestación? | En las agendas de las enfermeras gestoras de los equipos de atención primaria.  Las enfermeras gestoras, dentro de las 48 horas contadas desde el momento del alta, se ponían en contacto con el paciente (por teléfono o presencialmente) para hacer una revisión del plan terapéutico y determinar si había entendido correctamente las indicaciones dadas. Seguidamente se ponía en contacto con los profesionales asignados al paciente a fin de que ellos continuasen el seguimiento. |

| **Intervención 3c** | **Circuito de soporte al alta de urgencias** (**CSUrg)** |
| --- | --- |
| ¿Por qué? | Para garantizar la comunicación entre niveles asistenciales (de urgencias a primaria) en el momento en que el paciente es dado de alta. |
| ¿Qué se valora? | En todos los pacientes con la identificación de PCC en su HCE se valoraba el seguimiento apropiado en atención primaria de acuerdo a la condición clínica:  - incluidos en el programa de atención domiciliaria,  - con necesidad de soporte en la continuidad asistencial. |
| ¿Quién generaba el aviso? | Por defecto, el personal de admisiones de urgencias generaba un aviso en todas las altas de PCC.  El médico de urgencias podía generar una programación directa de visita con el médico de atención primaria, una vez valorados los criterios de inclusión y la situación clínica del paciente. |
| ¿Cómo se iniciaba la prestación? | En los casos que indicaba el médico de urgencias, se hacía la programación de visita en la agenda del médico de atención primaria.  En los restantes casos de PCC se programaba un aviso en las agendas de la enfermera gestora. En estos casos, las enfermeras hacían una valoración del informe y de la HCE del paciente, y según cuál fuera el motivo de la urgencia y el estado basal del paciente decidían si consideraban necesario establecer contacto con él (por teléfono o presencialmente). |
| ¿Dónde es accesible la prestación? | En las agendas de los médicos de atención primaria o de las enfermeras gestoras, según los casos. |

**4. Cultura organizativa**

| **Intervención 4** | **Sensibilización hacia la atención de PCC** |
| --- | --- |
| ¿Por qué? | Para «contaminar» a toda la organización en el manejo del paciente crónico en cualquier nivel asistencial de la entidad, mediante un debate continuo sobre cómo y dónde realizar la mejor atención. |
| ¿Qué? | La finalidad del programa es que el los PCC reciban una atención proactiva, resolutiva, adecuada, eficiente y satisfactoria en cualquier momento y con la intensidad que necesiten.  Esta atención debe facilitar el cuidado de estos pacientes con el dispositivo más adecuado, siendo el domicilio el eje sobre el que han de pivotar todos los recursos para mejorar la calidad de vida y los resultados en salud, y para garantizar una utilización eficiente de los recursos.  La atención a este grupo de pacientes requiere un cambio del modelo asistencial, de los planteamientos organizativos, de la gestión clínica, de la implicación de los profesionales y de los mismos enfermos y cuidadores. La base de este nuevo modelo recae en el abordaje asistencial conjunto entre los diversos niveles y profesionales, con dispositivos territoriales capaces de dar una respuesta rápida en el domicilio y con la intensidad que se requiera en cada momento.  Objetivos principales:   - Mejorar la atención del PCC y su estado de salud: mejorar la calidad de vida, los resultados de salud y la satisfacción del paciente y su familia. - Optimizar la eficiencia en la atención al PCC y poder liberar recursos para destinarlos a acciones de prevención de la cronicidad y control de la evolución hacia la complejidad. |
| Acciones de transmisión: ¿cómo? | - Se organizaron seminarios multidisciplinarios con representación de todos los agentes implicados de los diferentes niveles asistenciales: sistema de información, atención primaria, hospital de agudos, dependencia y servicios sociales. - Se programaron seminarios de casos clínicos, actualización de resultados y seguimiento de indicadores. |
| ¿Dónde? | - UPCC - Atención primaria - Servicio de urgencias - Atención sociosanitaria |
| ¿Quién? | Todos los profesionales. Sistema de transmisión de información y sensibilización «en cascada» a partir de referentes de cada unidad.  Referentes clínicos de PCC en cada servicio implicado: hospitalario (UPCC), centro de atención primaria y diferentes perfiles profesionales, médicos y enfermeras. |
| Seguimiento | Creación de un *banner* en la Intranet de la entidad donde quedó aglutinada toda la información referente a la atención del paciente crónico complejo. Se diferenciaron diferentes apartados:   - Indicadores de seguimiento, de proceso y resultado. - Resúmenes de los diferentes seminarios. - Presentaciones realizadas dentro de la entidad y externas. - Publicaciones. |

**Bibliografía**

1. Hoffmann TC, Glasziou PP, Boutron I, et al. Better reporting of interventions: template for intervention description and replication (TIDieR) checklist and guide. BMJ. 2014;348:g168.

2. Inoriza JM, Sánchez I, Carreras M, et al. Identificació i predicció del risc segons la morbiditat atesa al Baix Empordà. En: Direcció General de Regulació, Planificació i Recursos Sanitaris. Estudis d’Economia de la Salut, IV. 1ª ed. Barcelona: Generalitat de Catalunya, Departament de Salut; 2011. p. 1-60. (Consultado el 4/7/2016.) Disponible en:

http://canalsalut.gencat.cat/web/.content/home_canal_salut/professionals/recursos/altres_recursos_interes/estudis/08_planificacio_sanitaria/documents/risc_morbiditat_web.pdf

3. Hughes JS, Averill RF, Eisenhandler J, et al. Clinical Risk Groups (CRGs): a classification system for risk-adjusted capitation-based payment and health care management. Med Care. 2004;42:81-90.

4. Coderch J, Sánchez-Pérez I, Ibern P, et al. Prediccion del riesgo individual de alto coste sanitario para la identificacion de pacientes cronicos complejos. Gac Sanit. 2014;28:292-300.

5. [Morisky DE](http://www.ncbi.nlm.nih.gov/pubmed/?term=Morisky%20DE%5BAuthor%5D&cauthor=true&cauthor_uid=3945130), [Green LW](http://www.ncbi.nlm.nih.gov/pubmed/?term=Green%20LW%5BAuthor%5D&cauthor=true&cauthor_uid=3945130), [Levine DM](http://www.ncbi.nlm.nih.gov/pubmed/?term=Levine%20DM%5BAuthor%5D&cauthor=true&cauthor_uid=3945130). Concurrent and predictive validity of a self-reported measure of medication adherence. [Med Care.](http://www.ncbi.nlm.nih.gov/pubmed/3945130" \o "Medical care.) 1986;24:67-74.

6. García-González JV, Díaz-Palacios E, Salamea A, et al. Evaluación de la fiabilidad y validez de una escala de valoración social en el anciano. Aten Primaria. 1999;23:434-40.

7. Mahoney FI, Barthel DW. Functional evaluation: Barthel index. Md State Med J. 1965;14:61-5.

# 8. [Downton JH](http://www.ncbi.nlm.nih.gov/pubmed/?term=Downton%20JH%5BAuthor%5D&cauthor=true&cauthor_uid=1764490), [Andrews K](http://www.ncbi.nlm.nih.gov/pubmed/?term=Andrews%20K%5BAuthor%5D&cauthor=true&cauthor_uid=1764490). Prevalence, characteristics and factors associated with falls among the elderly living at home. [Aging (Milano).](http://www.ncbi.nlm.nih.gov/pubmed/1764490" \o "Aging (Milan, Italy).) 1991;3:219-28.
