# Supplementary material
Source: Elsevier journal article supplement (https://www.sciencedirect.com/science/article/pii/S0213911116301728)
Supplement: mmc2 [file S0213911116301728:mmc2.docx]

| **Apéndice 2**  **Actividad de atención primaria en pacientes crónicos complejos por tipos y según grupo de intervención. Serveis de Salut Integrats Baix Empordà, abril 2013-marzo 2014** | | | | | | |
| --- | --- | --- | --- | --- | --- | --- |
|  |  |  |  |  |  |  |
|  |  |  | Grupo control  (n = 1408) | Grupo de intervención parcial  (n = 1418) | Grupo de intervención total  (n = 1397) |  |
|  |  |  |  |  |  |  |
|  |  |  | Media (DE) | Media (DE) | Media (DE) |  |
|  |  |  |  |  |  |  |
| Visitas presenciales | Médicas |  | 6,10 (12,29) | 6,54 (10,91) | 7,01 (11,34)a |  |
|  | Enfermería |  | 9,15 (6,82) | 9,48 (7,40) | 10,41 (7,15)a | b |
|  |  |  |  |  |  |  |
| Avisos de alta | De hospitalización (agudos y sociosanitario) | | 0,07 (0,37) | 0,10 (0,37) | 0,10 (0,38)a |  |
|  | De urgencias hospital |  | 0,01 (0,08) | 0,49 (1,02)a | 0,47 (0,93)a |  |
|  |  |  |  |  |  |  |
| Visitas no presenciales | Gestiones clínico-administrativas |  | 1,35 (2,04) | 1,78 (2,35)a | 2,51 (2,43)a | b |
|  | Revisiones de prescripción crónica |  | 1,37 (1,76) | 1,47 (1,82) | 1,49 (1,90) |  |
|  | Visitas telefónicas |  | 0,88 (1,94) | 1,06 (2,74)a | 1,00 (2,15) |  |
|  |  |  |  |  |  |  |
| Urgencias en atención primaria | |  | 1,41 (2,85) | 1,28 (2,24) | 1,27 (2,15) |  |
|  |  |  |  |  |  |  |
| Total contactos con atención primaria | |  | 15,28 (15,43) | 16,04 (15,35) | 17,44 (15,22)a | b |
|  |  |  |  |  |  |  |
| DE: desviación estándar. |  |  |  |  |  |  |
| a Diferencias en comparación con el grupo control: p <0,05 (ANOVA, test de Scheffé). | |  |  |  |  |  |
| b Diferencias entre los grupos de intervención parcial y total: p <0,05 (ANOVA, test de Scheffé). | | | | |  |  |
